# Supplementary material
Source: publisher site journal article supplement (http://www.kjim.org/upload/media/kjim-2020-240-suppl3.pdf)
Supplement: Supplementary file 1 [file kjim-2020-240-suppl3.pdf]

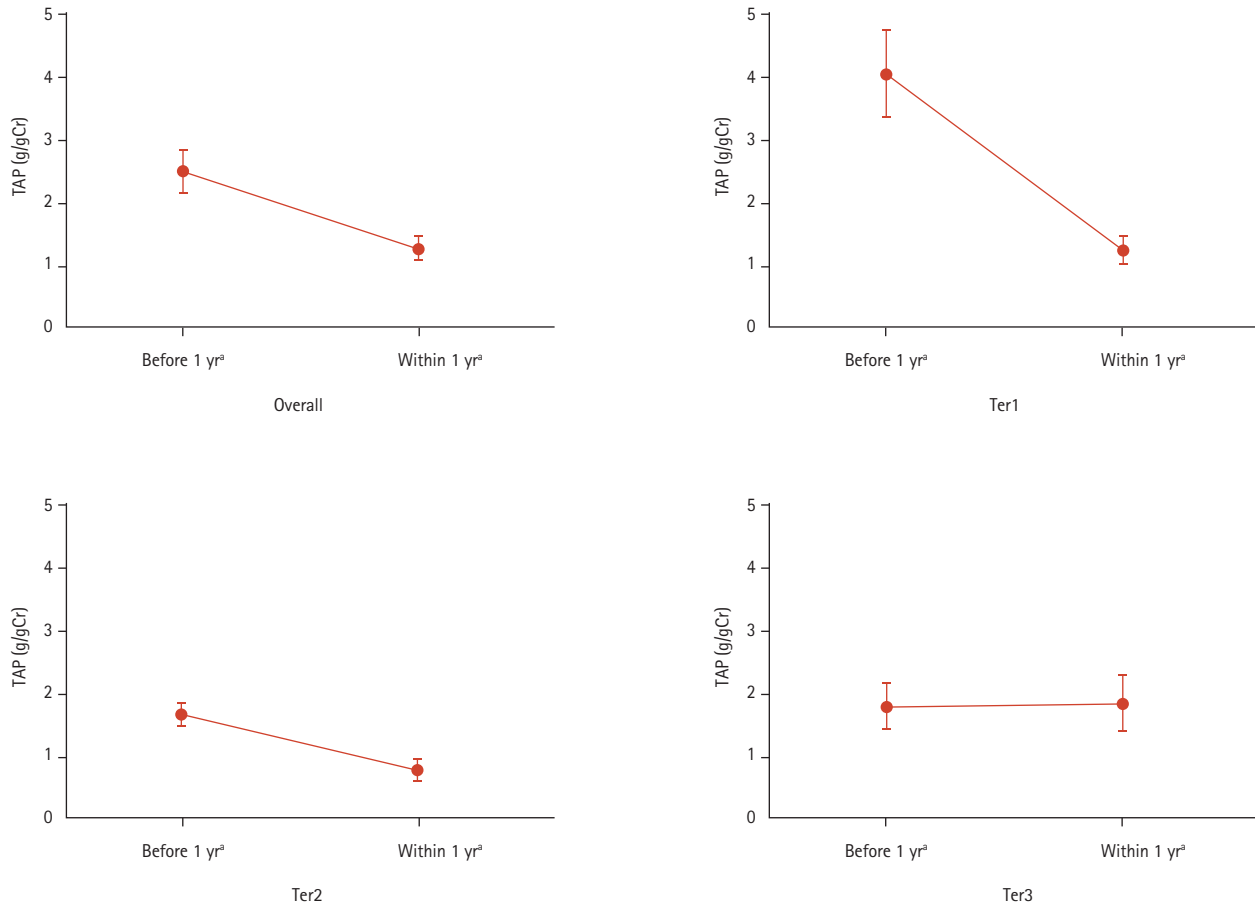

**Supplementary Figure 1.** Differences in time-averaged proteinuria within 12 months before and after the start of immunosuppression. Patients were categorized into tertiles according to the extent of time-averaged proteinuria reduction after immunosuppression. Markers and capped spikes represent means and 95% confidence intervals. TAP, time-averaged proteinuria; Ter1, first tertile; Ter2, second tertile; Ter3, third tertile. <sup>a</sup>Time points were from the start of immunosuppression therapy.
